# Supplementary material for: The evolution of snow bedforms in the Colorado Front Range and the processes that shape them
Source: Copernicus journal article supplement (doi:10.5194/tc-13-1267-2019), 2019-04-16
Supplement: Supplementary file 1 [file tc-13-1267-2019-supplement.pdf]

Supplement of The Cryosphere, 13, 1267–1281, 2019  
<https://doi.org/10.5194/tc-13-1267-2019-supplement>  
© Author(s) 2019. This work is distributed under  
the Creative Commons Attribution 4.0 License.

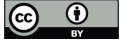

*Supplement of*

## **The evolution of snow bedforms in the Colorado Front Range and the processes that shape them**

**Kelly Kochanski et al.**

*Correspondence to:* Kelly Kochanski ([kelly.kochanski@colorado.edu](mailto:kelly.kochanski@colorado.edu))

The copyright of individual parts of the supplement might differ from the CC BY 4.0 License.

## Contents of this document

1. Contents of video S1
2. Observations of snow bedforms throughout the Front Range
3. Review: the processes that shape snow surfaces

### 5 S1 Contents of video S1

Video S1 (Kochanski (2018), available at <https://av.tib.eu/media/38612>, doi:10.5446/38612) shows time-lapse imagery of the movement of bedforms on Niwot Ridge. Many figures in the text were derived from this imagery:

| <b>Start time in video S1</b> | <b>Title</b>                                | <b>Related Figure</b> |
|-------------------------------|---------------------------------------------|-----------------------|
| 0:07                          | Close-packed snow dunes                     | Fig. 3b               |
| 0:38                          | Barchan snow dunes                          | Fig. 3d               |
| 0:56                          | Tiny barchan dune, close-up                 | Fig. 3c               |
| 1:06                          | Barchan snow dunes                          | Fig. 4a               |
| 1:33                          | Snow ripples                                | Fig. 5a               |
| 2:06                          | Sand-on-snow ripples                        | Fig. 5b               |
| 2:24                          | Ripples emerge from flat snow               | Fig. 5c               |
| 2:51                          | Sastrugi retreat (play video at high speed) | Fig. 6a               |
| 3:06                          | Sastrugi retreat between snow-waves         | Fig. 6b               |
| 3:32                          | Snow-steps behind wave                      | Fig. 7a               |
| 3:57                          | Snow-steps, two layers                      | Fig. 7b               |
| 4:17                          | Snow-wave                                   | Fig. 8b               |
| 4:44                          | Snow-wave with ripples and snow-steps       | Fig. 9a               |

### S2 Observations of snow bedforms throughout the Front Range

- 10 During our initial survey of snow bedforms, we observed diverse snow features on numerous fields, ridges, and frozen lakes throughout the Front Range. These observations are summarized in Table S1. Our observations on Niwot Ridge are listed in Table S2.

| Name           | Lat.   | Long.    | Alt.  | Site notes                         | Trip date(s)  | Trip notes                                                                          |
|----------------|--------|----------|-------|------------------------------------|---------------|-------------------------------------------------------------------------------------|
| Barker Res.    | 39.963 | -105.501 | 2483m | See 'Methods'                      | Various       | Stealth dunes, wingspans 5cm-2m.                                                    |
| Baseline Res.  | 40.002 | -105.204 | 1621m | 900m reservoir on plains           | 26/Dec/2016   | Stealth dunes, wingspans up to 5m.                                                  |
| Boulder Res.   | 40.074 | -105.229 | 1579m | 1850m reservoir marred by skiers   | 13/Jan/2016   | Smooth snow, heavy with melt.                                                       |
| Brainerd Lake  | 40.078 | -105.575 | 3158m | 430m lake in forested valley       | 25/Jan/2016   | Warm day. Semi-melted snow w/suncups.                                               |
|                |        |          |       |                                    | 18/Nov/2016   | Windswept ice, ground blizzard. On-shore snowdrifts have ripples and tiny sastrugi. |
| Gold Camp Rd   | 38.745 | -105.123 | 3030m | Mountain pass strung w/snow fences | 4/Feb/2017    | Lumpy drifts, tiny sastrugi.                                                        |
| Kite Lake      | 39.330 | -106.130 | 3667m | 195m-long lake in alpine meadow.   | 28/Dec/2016   | Elaborate ripples behind snow fence.                                                |
| Lake Peterson  | 40.557 | -105.790 | 2899m | 860m lake in forested valley       | 18/Feb/2018   | Windy Day. Flat snow, shallow sastrugi.                                             |
| Lefthand Res.  | 40.069 | -105.557 | 2520m | 1050m reservoir in forested valley | 14/Jan/2016   | Shallow sastrugi, indistinct drifts.                                                |
|                |        |          |       |                                    | 07/Jan/2016   | Good weather. Snow-waves on sastrugi.                                               |
|                |        |          |       |                                    | 04/Feb/2016   | Windy, cold. Fresh drifts on old sastrugi.                                          |
|                |        |          |       |                                    | 22/Feb/2017   | Falling powder. Flat snow everywhere.                                               |
| Lily Lake      | 40.307 | -105.540 | 2725m | 470m lake in sparse alpine forest  | 30/Jan/2018   | Clear day. Possible dune remnants.                                                  |
| Mt Democrat    | 39.341 | -106.134 | 4156m | High ridge between two summits     | 18/Feb/2/2018 | Clear day, windy. Shallow sastrugi.                                                 |
| Niwot Ridge D1 | 40.050 | -105.616 | 3741m | Upwind end of Niwot Ridge          | 28/Mar/2016   | Clear, fresh snow. Lanceolate sastrugi.                                             |
| Quandary Ridge | 39.393 | -106.078 | 3693m | Alpine ridge                       | 20/Jan/2018   | Clear, warm. Shallow sastrugi + bare rock.                                          |
|                |        |          |       |                                    | 09/Mar/2018   | Clear day, low wind. Flat snow below treeline, higher elevations windswept.         |

**Table S1.** Bedforms observed throughout the Colorado Front Range.

| <b>Date</b> | <b>Weather</b>                          | <b>Bedforms observed</b>                                      |
|-------------|-----------------------------------------|---------------------------------------------------------------|
| 21/Feb/2016 | Clear day                               | Well-developed sastrugi                                       |
| 17/Mar/2016 | Clear day                               | Well-developed sastrugi                                       |
| Date        | Weather notes                           | Bedforms                                                      |
| 26/Mar/2016 | Falling snow                            | Flat surface                                                  |
| 27/Mar/2016 | Ground blizzard                         | Ripples at 9am, soft sastrugi by 6pm                          |
| 28/Mar/2016 | Clear day                               | Well-developed sastrugi, angular, some lanceolate             |
| 17/Apr/2016 | Clear day                               | Well-developed sastrugi marked by suncups                     |
| 11/May/2016 | Clear day                               | Shallow sastrugi.                                             |
| 03/Dec/2016 | Blowing snow                            | Shallow sastrugi, much exposed bare ground.                   |
| 02/Jan/2017 | Clear day.                              | Very large sastrugi/.                                         |
| 03/Jan/2017 | Freshly-fallen snow                     | Flat surface                                                  |
| 27/Jan/2017 | Ground blizzard, cold.                  | Well-formed sastrugi.                                         |
| 28/Jan/2017 | Ground blizzard.                        | Loose snow on soft sastrugi, occasional ripples               |
| 18/Feb/2017 | Day-old snow, windy, some blowing snow  | Very big sastrugi, some over a meter deep                     |
| 25/Mar/2017 | Snow beginning to fall in late evening. | Flat surface.                                                 |
| 26/Mar/2017 | Day after light snowfall.               | Smooth, flat snow filling troughs of suncup-covered sastrugi. |
| 09/Nov/2017 | Ground blizzard                         | Many snow-waves, tiny barchan dunes                           |
| 12/Nov/2017 | Ground blizzard                         | Patchy snow cover, tall snow-waves on shallow sastrugi        |
| 20/Jan/2018 | Warm and sunny, gentle winds            | Patchy snow, irregular sastrugi                               |
| 03/Mar/2018 | Clear, sunny day                        | 20–50cm tall barchan dunes on shallow sastrugi                |
| 14/Apr/2018 | Clear, sunny day                        | Low-lying dunes, snow-steps                                   |

**Table S2.** Field observations on Niwot Ridge, CO

### S3 Review: the processes that shape snow surfaces

Bedforms grow from the movement of many individual grains of snow. The movements of those grains are driven by snow processes and by aeolian transport. Here, we provide a brief overview of these processes, as well as the principles of self-organization that allow these granular processes to add up to bedforms. This overview is intended to orient Earth surface process scientists unfamiliar with snow, or snow scientists new to aeolian transport. Full details and rates of each process are provided in references.

#### S3.1 The appearance and disappearance of snow

Snow surfaces exchange mass with the open air. Snow is usually added to a surface by snowfall. Freshly-fallen snow particles are usually larger and more dendritic than particles that have been exposed to air, warmth, or wind (Fierz et al., 2009). Snow may also be carried into an area from upwind (§ ).

When snow is in contact with dry air, it turns into water vapor by sublimation. This vapor moves through the pores of the snowpack. If the vapor exits into open air, the snowpack loses mass (Marks and Davis, 1992) without becoming wet. The rate of sublimation depends on the relative humidity and on the surface area of the snow, which is highest for dendritic or airborne snow.

#### S3.2 The solidification of snow

Water vapor forms wherever ice crystals touch air. This vapor moves through the pores between snow grains, and re-crystallizes in response to local temperature and vapor pressure gradients. This microscopic sublimation and deposition leads to the *dry metamorphism* of snow. Absent a strong temperature gradient, the water vapor tends to diffuse from the convex edges of snow particles to their concave contact points (Colbeck, 1983, 1998). This bonds the particles together and increases the hardness and cohesion of the snowpack. This process, known as *sintering*, is reviewed by Blackford (2007). Sintering depends strongly on temperature, humidity, and grain size. Small, wind-broken snow particles have high surface area and sinter extremely quickly. This process, known as *wind hardening*, forms hard, dense surface layers known as *wind slab* (Colbeck, 1991; Fierz et al., 2009).

If saturated snow is subject to repeated melting and freezing temperatures, it may form internal ice layers (Fierz et al., 2009), or a surface *sun crust* (also called a ‘rain crust’ or ‘spring crust’). Smaller quantities of liquid water, that do not fully saturate the snow, are subject to surface tension in the pores of the snow, and bond snow grains together through *wet metamorphism* much faster than they could sinter in dry air (Blackford, 2007). Most snow bedforms have been documented in dry climates where these wet processes are rare.

#### S3.3 The transport of loose snow and the erosion of solid snow

Airborne particles of sand or snow capture momentum from the air. When they strike the Earth, they launch further grains into the air (Anderson and Haff, 1988; Bagnold, 1941; Kobayashi, 1972; Schmidt, 1986). This process, known as saltation, is the primary method of momentum and energy transfer from the wind to a granular bed (Anderson and Haff, 1988; Schmidt, 1986). Saltation is initiated above a certain windspeed at which snow from the surface is entrained (Li and Pomeroy, 1997), and has considerable momentum thereafter.

In a unidirectional flow, saltation impacts are concentrated against the upwind sides of any emerging bedforms. This generates a positive feedback that enlarges small variations in the topography and leads to self-organization. Sustained saltation on a bed of loose grains leads to the formation of ripples (Anderson, 1987; Kobayashi, 1980). On hard surfaces, saltation impacts form bedforms such as yardangs, pits, and flutes (Laity, 1994).

The shear stress of the wind or the grain-grain forces associated with saltation impacts are not always sufficient to launch a particle into the air. Loose particles may be dislodged from the bed and rolled forward without being separated from the ground. This is known as surface creep (Bagnold, 1937).

While large wind-borne grains fall quickly back to the bed, small grains are sensitive to turbulent fluctuations in the wind. These fluctuations may buffet the grains indefinitely upward (Anderson, 1986), and create long, stochastic flight trajectories. If the grains do not return, then the wind creates a net removal of mass, known as *deflation* (Laity, 1994).

- 5 Finally, the impact forces that drive the motion of wind-blown snow also fragment snow crystals (Nemoto et al., 2014).  
Continuous fragmentation moves ice mass from large particles that creep and saltate into small particles that become suspended (Comola et al., 2017). This potentially limits the total advecting flux of saltating particles that can be produced from a certain quantity of snowfall, before all particles are broken into small fragments that blow or sublimate away.

### **S3.4 Self-organization**

- 10 Self-organization occurs in unstable systems, in which tiny perturbations do not decay, but grow into large features. Ripple growth, described above and in (Anderson, 1987), is one example of self-organization driven by the growth of an instability.

- 15 The processes that drive self-organization are generally non-linear, or critical, and occur when small movements create large effects. The archetypical critical process is an avalanche of sand grains (alpine snow avalanches are more complex). When sand is piled to its angle of repose, it can get no steeper. It responds to the addition of more grains with a disproportionately large response: an avalanche. The slope angle is thereby organized, and remains unchanged as further grains are added. Avalanches organize the downwind faces of barchan dunes.

- 20 Non-linear processes and self-organization are not easy to reverse. Systems that are driven by forces with non-linear effects often exhibit hysteresis, and do not return to their previous states even if the driving force removed or reversed. Ripples, for example, do not become flat if the wind reverses; they just move in a different direction. Moreover, from a physical perspective, self-organization is generally driven by increases in entropy, and cannot be reversed without the addition of directed work or energy.

## References

- Anderson, R. S.: Eolian sediment transport as a stochastic process: the effects of a fluctuating wind on particle trajectories', *Journal of Geology*, 95, 497–512, 1986.
- Anderson, R. S.: A theoretical model for aeolian impact ripples, *Sedimentology*, 34, 943–956, 1987.
- 5 Anderson, R. S. and Haff, P. K.: Simulation of eolian saltation., *Science (New York, N.Y.)*, 241, 820–823, <https://doi.org/10.1126/science.241.4867.820>, 1988.
- Bagnold, R. A.: The transport of sand by wind, *The Geographical Journal*, 89, 409–438, 1937.
- Bagnold, R. A.: *The Physics of Blown Sand and Desert Dunes*, Methuen, London, 1941.
- Blackford, J. R.: Sintering and microstructure of ice: a review, *Journal of Physics D: Applied Physics*, 40, R355–R385, <https://doi.org/10.1088/0022-3727/40/21/R02>, 2007.
- 10 Colbeck, S. C.: Theory of metamorphism of dry snow, *J. Geophys. Res.*, 88, 5475–5482, <https://doi.org/10.1029/JC088iC09p05475>, 1983.
- Colbeck, S. C.: The layered character of snow, *Reviews of Geophysics*, 29, 81–96, 1991.
- Colbeck, S. C.: Sintering in a dry snow cover, *Journal of Applied Physics*, 84, <https://doi.org/10.1063/1.368684>, 1998.
- Comola, F., Kok, J. F., Gaume, J., Paterna, E., and Lehning, M.: Fragmentation of wind-blown snow crystals, *Geophysical Research Letters*, <https://doi.org/10.1002/2017GL073039>, 2017.
- 15 Fierz, C., Armstrong, R., Durand, Y., Etchevers, P., Greene, E., McClung, D., Nishimura, K., Satyawali, P., and Sokratov, S.: The international classification for seasonal snow on the ground, *IHP-VII Technical Documents in Hydrology*, 83, 90, 2009.
- Kobayashi, D.: Studies of snow transport in low-level drifting snow, *Contributions from the Institute of Low Temperature Science*, A24, 1–58, 1972.
- 20 Kobayashi, S.: Studies on interaction between wind and dry snow surface, *Contributions from the Institute of Low Temperature Science*, A29, 1–64, 1980.
- Kochanski, K.: The movement of snow bedforms in the Colorado Front Range, <https://doi.org/10.5446/38612>, <https://av.tib.eu/media/38612>, 2018.
- Laity, J. E.: Landforms of aeolian erosion, in: *Geomorphology of Desert Environments*, pp. 506–535, Springer, Dordrecht, [https://doi.org/10.1007/978-94-015-8254-4\\_19](https://doi.org/10.1007/978-94-015-8254-4_19), 1994.
- 25 Li, L. and Pomeroy, J. W.: Estimates of threshold wind speeds for snow transport using meteorological data, *Journal of Applied Meteorology*, 36, 205–213, [https://doi.org/10.1175/1520-0450\(1997\)036<0205:EOTWSF>2.0.CO;2](https://doi.org/10.1175/1520-0450(1997)036<0205:EOTWSF>2.0.CO;2), 1997.
- Marks, D. and Davis, E.: Climate and Energy Exchange at the Snow Surface in the Alpine Region of the Sierra Nevada Measurements and Monitoring, *Water Resources Research*, 28, 3029–3042, 1992.
- 30 Nemoto, M., Sato, T., Kosugi, K., and Mochizuki, S.: Effects of Snowfall on Drifting Snow and Wind Structure Near a Surface, *Boundary-Layer Meteorology*, 152, 395–410, <https://doi.org/10.1007/s10546-014-9924-4>, 2014.
- Schmidt, R. A.: Transport rate of drifting snow and the mean wind speed profile, *Boundary-Layer Meteorology*, 34, 213–241, 1986.
